# Supplementary material for: Digital Natives und Digital Immigrants
Source: Springer Nature journal article supplement (doi:10.1007/s11576-013-0390-2), 2013-11-11
Supplement: 11576_2013_390_MOESM1_ESM.pdf [file 11576_2013_390_MOESM1_ESM.pdf]

# **Digital Natives und Digital Immigrants – Entwicklung eines Modells digitaler Gewandtheit**

**Qian (Emily) Wang, Michael D. Myers, David Sundaram**

WIRTSCHAFTSINFORMATIK (2013) 55 (6)

Anhang (online verfügbar unter <http://www.wirtschaftsinformatik.de>)

## Anhang I: Inklusionskriterien

| Nr. | Kriterium                                      | Begründung                                                                                                                                                                                                                                                                               |
|-----|------------------------------------------------|------------------------------------------------------------------------------------------------------------------------------------------------------------------------------------------------------------------------------------------------------------------------------------------|
| 1   | Theoretical papers                             | They provide working assumptions and insights for future research directions.                                                                                                                                                                                                            |
| 2   | Quantitative and qualitative empirical studies | They provide empirical evidence.                                                                                                                                                                                                                                                         |
| 3   | Education sector                               | The “digital natives” idea originated and has been well explored in the education field.                                                                                                                                                                                                 |
| 4   | Information Systems and science sectors        | These two areas are closely related to digital fluency.<br><br>Note: articles from other fields may be included if the article is very relevant. For example, the marketing sector would be interested in how people with different digital fluency levels react to marketing campaigns. |
| 5   | All countries                                  | This allows a cross-country comparison.                                                                                                                                                                                                                                                  |
| 6   | All contexts (teaching institution or firms)   | Ensures that all contexts are considered, not just in teaching institutions.                                                                                                                                                                                                             |

## Anhang II: Exklusionskriterien

| Nr. | Kriterium                                                 | Begründung                                                                                                        |
|-----|-----------------------------------------------------------|-------------------------------------------------------------------------------------------------------------------|
| 1   | Pre-1999                                                  | Tapscott coined the term “net generation” in 1998 whereas Prensky defined “digital natives” in 2001.              |
| 2   | Non peer-reviewed articles                                | Ensure the articles’ source and validity.                                                                         |
| 3   | Exclude subject fields that are not related to the topic. | Words such as “natives”, “immigrants” and “literacy” sometimes lead to results that are not related to the topic. |
| 4   | Digital library research                                  | This is not related to digital fluency                                                                            |
| 5   | Competence in other areas with digital aided training     | This is not related to digital fluency                                                                            |
